# Supplementary material for: Improving the optical and thermoelectric properties of Cs2InAgCl6 with heavy substitutional doping: a DFT insight
Source: Royal Society of Chemistry journal article supplement (doi:10.1039/d0ra01840f), 2021-01-01
Supplement: d0ra01840f2.pdf [file d0ra01840f2.pdf]

## Supporting Information

### Improving the Optical and Thermoelectric Properties of $\text{Cs}_2\text{InAgCl}_6$ with Heavy Substitutional Doping: A DFT Insight

K. C. Bhamu<sup>\*1,2</sup>, Enamul Haque<sup>‡3</sup>, C.S. Praveen<sup>4,5</sup>, Nandha Kumar<sup>6</sup>, G. Yumnam<sup>7</sup>, Md. Anwar Hossain<sup>3</sup>, and Gautam Sharma<sup>8</sup>

<sup>1</sup>PMC Division, CSIR-National Chemical Laboratory, Pune 411008, Maharashtra, India

<sup>2</sup>Department of Physics, Gramin Mahila P. G. College, Sikar 332024, Rajasthan, India

<sup>3</sup>Department of Physics, Mawlana Bhashani Science and Technology University, Santosh, Tangail-1902, Bangladesh.

<sup>4</sup>International School of Photonics, Cochin University of Science and Technology, University Road, South Kalamassery, Kalamassery, Ernakulam, Kerala 682022, India

<sup>5</sup>Inter University Centre For Nano Materials and Devices, Cochin University of Science and Technology, University Road, South Kalamassery, Kalamassery, Ernakulam, Kerala 682022, India

<sup>6</sup>The Abdus Salam International Centre for Theoretical Physics, Strada Costiera 11, 34151 Trieste, Italy

<sup>7</sup>Department of Physics and Astronomy, University of Missouri, Columbia, USA 65211

<sup>8</sup>Department of Physics, Indian Institute of Science Education and Research, Pune 411008

\*Corresponding author Email: kcbhamu85@gmail.com

‡Email: enamul.phy15@yahoo.com

#### SI 1. Structural details

The double-perovskite  $\text{Cs}_2\text{InAgCl}_6$  crystallizes in a face-centered cubic structure with 40 atoms per unit cell. The unit cell contains two octahedra: one  $\text{InCl}_6$  and the other  $\text{AgCl}_6$ . These two octahedra alternate along the different crystallographic planes: [100], [010], and [001].

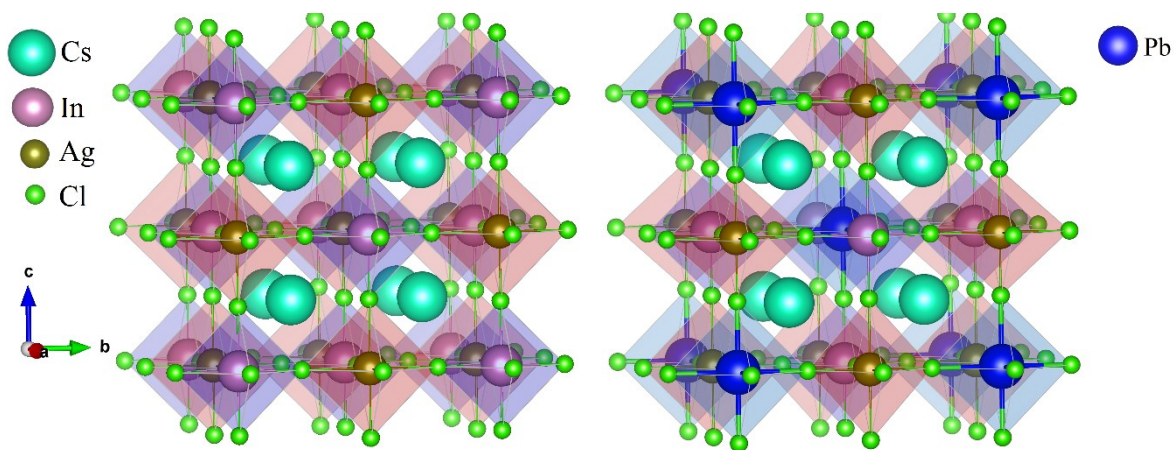

Fig. SI-1: Crystal structure of double perovskite  $\text{Cs}_2\text{InAgCl}_6$  (left panel), and Pb-substituted- $\text{Cs}_2\text{InAgCl}_6$  (right panel).

The unit cell of  $\text{Cs}_2\text{InAgCl}_6$  is shown in the left panel of Fig. SI-1. The K/Rb based structure is almost identical to the pristine  $\text{Cs}_2\text{InAgCl}_6$  structure. The right panel shows the crystal structure of 25% Pb. We are not showing the crystal structure for other doped systems. This structure seems to be an octahedrally distorted antiperovskite type structure.

## SI 2. Electronic structure

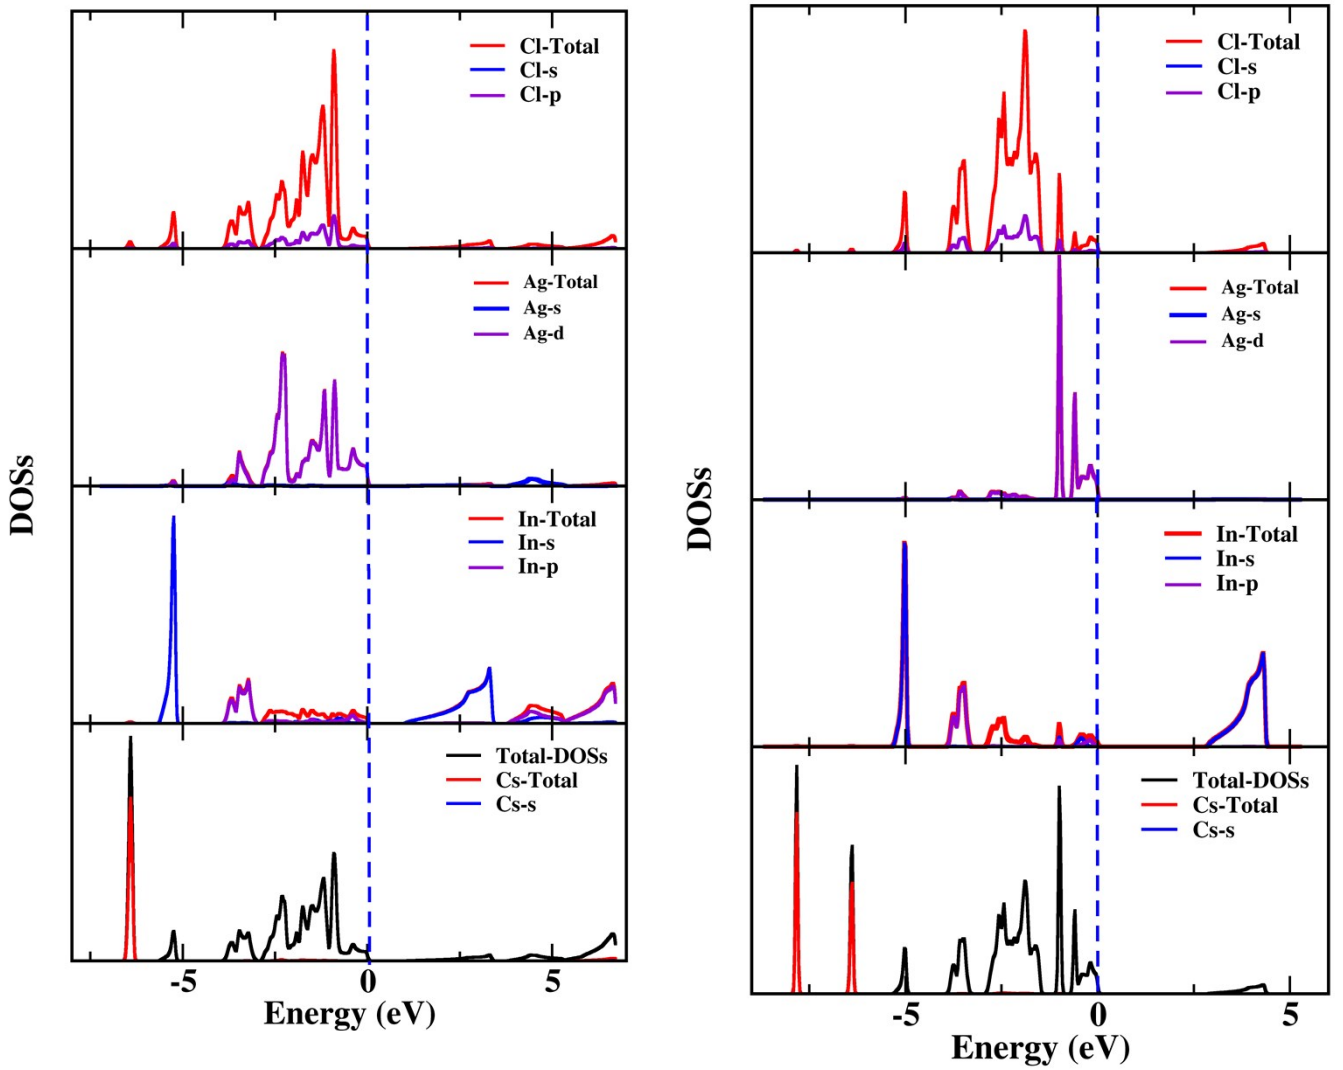

Fig. SI-2: Calculated total, atom, and orbital decomposed density of states of pristine  $\text{Cs}_2\text{InAgCl}_6$  by using PBE functional (left panel) and with KTB-mBJ+SO potential (right panel).

We see from DOSs that in the pristine case the valence band maximum (VBM) is composed of Ag-*d* and Cl-*p* states while conduction band minimum is originated from In-*s* and Ag-*s* (minor contribution) states. Assuming a similar trend for PBE and KTB-mBJ+SO for doped materials as we observe for pristine, we report only KTB-mBJ+SOC band structure only for the doped case.

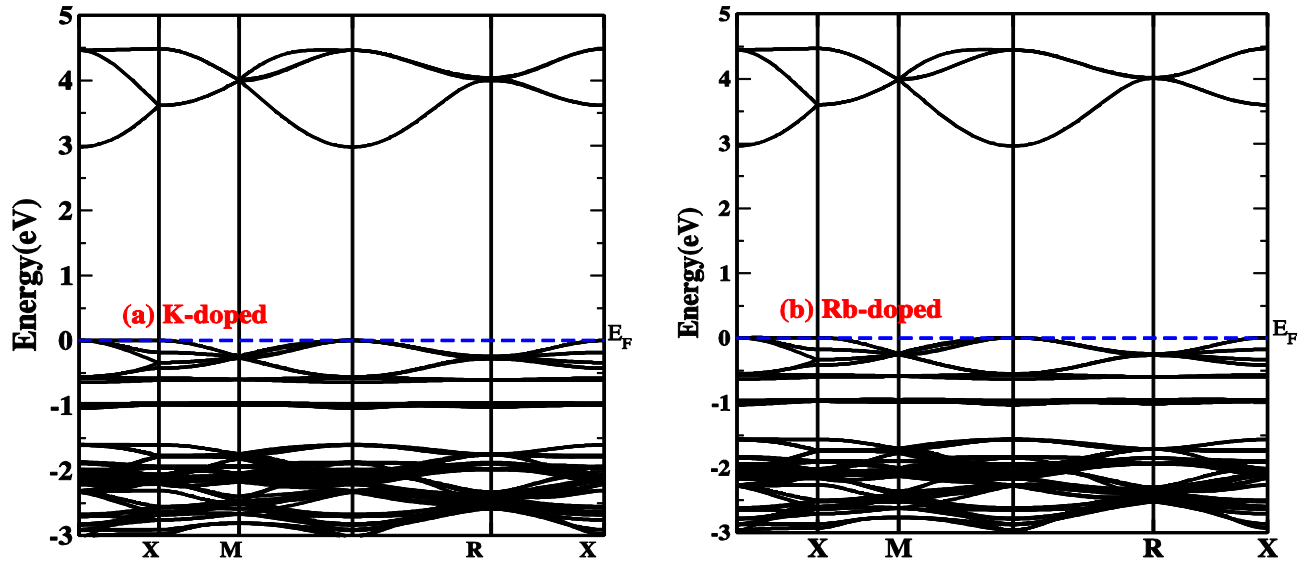

Fig. SI-3: Electronic dispersion relations of: (a) K- doped and (b) Rb-doped  $\text{Cs}_2\text{InAgCl}_6$  by using PBE functional with KTB-mBJ potential including SO effect. The blue dash line represents the Fermi level.

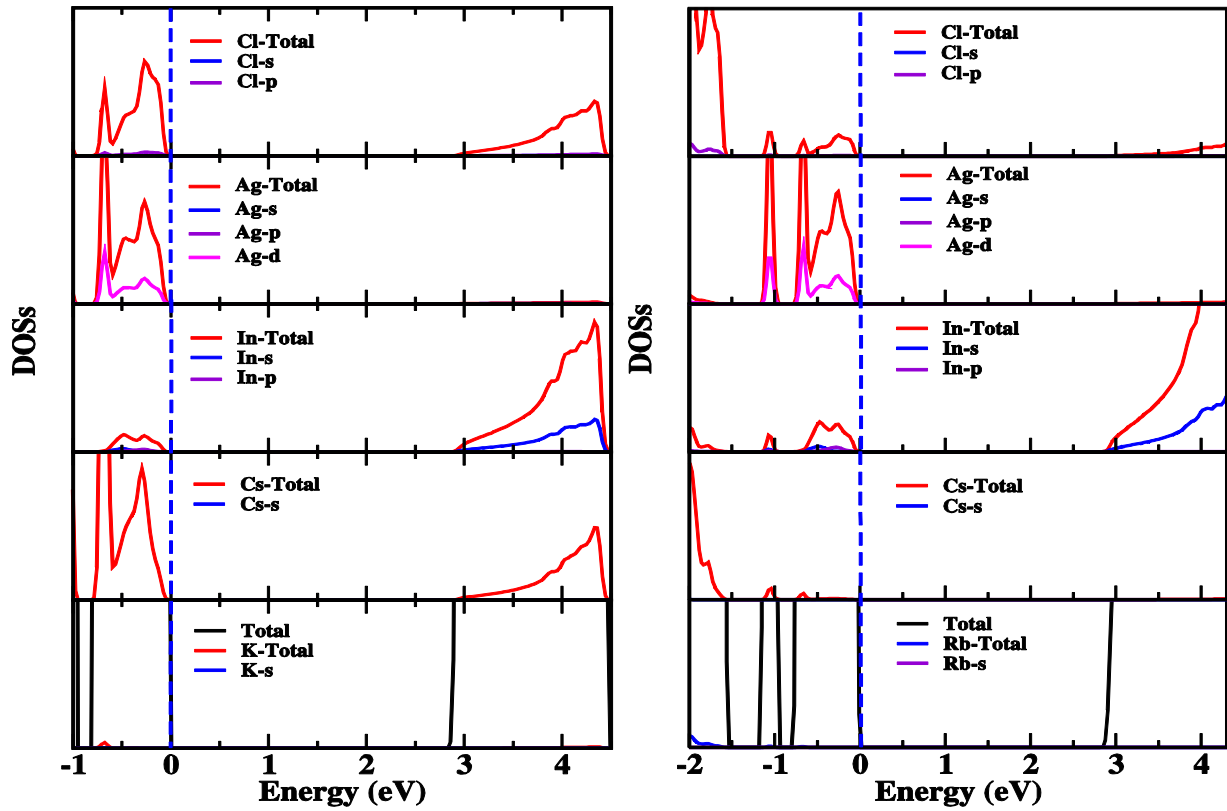

Fig. SI-4: Calculated total, atom, and orbital decomposed density of states of 25% K- (Left panel) and Rb-doped (Right panel).

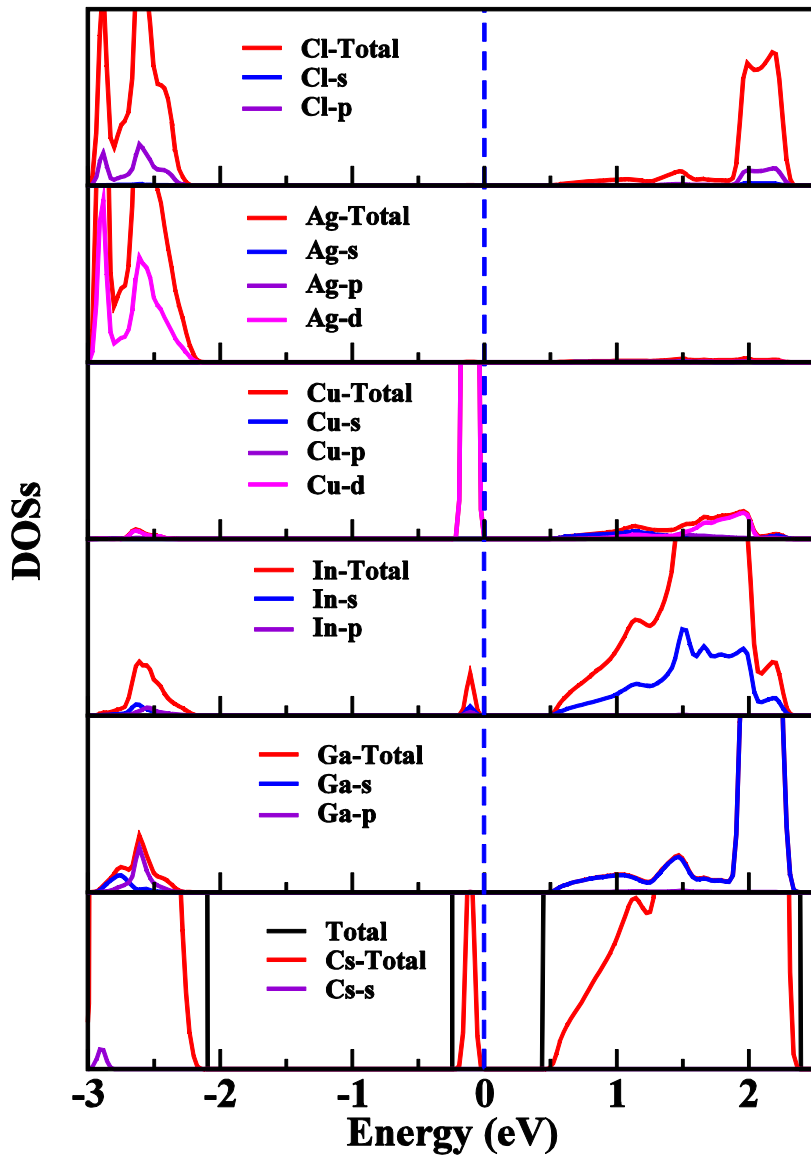

Fig. SI-5: Calculated total, atom, and orbital decomposed density of states of 12.5% Cu & 12.5% Ga-co-doped  $\text{Cs}_2\text{InAgCl}_6$ .

**Table-SI-1:** Equilibrium lattice parameters of pristine  $\text{Cs}_2\text{InAgCl}_6$  along with its doped derivatives with experimental and other available data (symbols have their usual meaning).

| Material                     | Space group | a (Å) (PBE) | ( $\Delta a/a$ )% | Exp. [17] | Cal. (Others)                                              |
|------------------------------|-------------|-------------|-------------------|-----------|------------------------------------------------------------|
| $\text{Cs}_2\text{InAgCl}_6$ | 225 (Fm-3m) | 10.676      | -                 | 10.467    | 10.20 (LDA) [17],<br>10.23 (LDA) [36],<br>10.62 (HSE) [17] |
| Cu-Ga co-doped               | 221 (Pm-3m) | 10.545      | 1.23              | -         | -                                                          |
| K-0.25                       | 224 (Pn-3m) | 10.629      | 0.28              | -         | -                                                          |
| Rb-0.25                      | 224 (Pn-3m) | 10.646      | 0.44              | -         | -                                                          |
| Sn-0.25                      | 221 (Pm-3m) | 10.854      | 1.67              | -         | -                                                          |
| Pb-0.25                      | 221 (Pm-3m) | 10.916      | 2.25              | -         | -                                                          |

Pb/Rb/K/Cs/Sn/In/Ag\*/Cl\*: 2.5/2.5/2.5/2.5/2.5/2.5/2.37/2.4/1.85

\* $R_{\text{mt}}$  for Ag/Cl for pristine case is 2.5/2.04.

**Table-SI-2:** Calculated bandgap of  $\text{Cs}_2\text{InAgCl}_6$  by using different approaches of functional along with other theoretical and experimental values. The bandgap of the studied alloys is listed for PBE functional and KTB-mBJ potential only.

| Compound                            | PBE  | TB-mBJ |      | nKTB-mBJ |      | KTB-mBJ |      | HSE      | PBE0   | EXP.   |        |
|-------------------------------------|------|--------|------|----------|------|---------|------|----------|--------|--------|--------|
|                                     | PBE  | +SOC   | mBJ  | +SOC     | mBJ  | +SOC    | mBJ  | +SOC     |        |        |        |
| Cs <sub>2</sub> InAgCl <sub>6</sub> | 1.03 | 1.004  | 2.57 | 2.46     | 2.68 | 2.56    | 2.91 | 2.85 (d) | 2.6[1] | 2.7[1] | 3.3[1] |
| Cu &Ga                              | 0.12 | 0.09   | -    | -        | -    | -       | -    | 0.65 (I) | -      | -      | -      |
| K-0.25                              | 1.11 | 1.08   | -    | -        | -    | -       | -    | 3.03 (d) | -      | -      | -      |
| Rb-0.25                             | 1.11 | 1.09   | -    | -        | -    | -       | -    | 3.01 (d) | -      | -      | -      |
| Pb-0.25                             | 2.13 | 1.85   | -    | -        | -    | -       | -    | 2.40 (I) | -      | -      | -      |
| Sn-0.25                             | 1.66 | 1.59   | -    | -        | -    | -       | -    | 2.08 (I) | -      | -      | -      |

### Formation energy:

To check the chemical and mechanical stability of the studied compounds, we have computed the formation energy (using Eq.-1) and elastic constants. Negative formation energies confirmation that these systems are chemically stable. The calculated the elastic constants satisfies the necessary mechanical stability condition (Eq.-8) for cubic case which predicts the mechanical stability of pristine  $\text{Cs}_2\text{AgInCl}_6$  and its doped derivatives.

### Computational Details:

To calculate the formation energy, we performed a series of calculations by using plane wave (PW) method as implemented in Quantum Espresso<sup>1</sup>. We used 100(1000) Ry kinetic cut-off energy for wavefunction(charge density). convergence threshold on forces (a.u) for ionic minimization was  $10^{-3}$  and convergence threshold on total energy (a.u) for ionic minimization was  $10^{-4}$ . Structre was visualised using XcrySDen software<sup>2</sup>.

### Formation Energy:

The chemical stability of the pristine and doped systems was checked using below equation:

$$E_{\text{formation}} = E_{\text{product}} - E_{\text{reactant}} \quad (1)$$

The calculated values are:

$$E(\text{Pristine}) = -8.17306 \text{ Ry} \quad (2)$$

$$E(\text{Cu \& Ga co-doping}) = -8.21226 \text{ Ry} \quad (3)$$

$$E(\text{K-25\% doped}) = -8.24138 \text{ Ry} \quad (4)$$

$$E(\text{Rb-25\% doped}) = -8.25616 \text{ Ry} \quad (5)$$

$$E (\text{Pb-25\% doped}) = -8.35351 \text{ Ry} \quad (6)$$

$$E (\text{Sn-25\% doped}) = -8.33529 \text{ Ry} \quad (7)$$

From above equations (2-7), we can see that the energy difference between the product and the reactant is negative, which confirms the chemical stability of the studied systems. In the **Table-SI3**, we give ground state energy of the calculated systems.

**Table-SI-3:** Calculated formation energy of  $\text{Cs}_2\text{InAgCl}_6$  and its doped derivatives. Unit is in Ry.

| $\text{Cs}_2\text{AgInCl}_6$                                     | $\text{Cs}_2\text{Ag}(\text{Cu})\text{In}(\text{Ga})\text{Cl}_6$ | $\text{Cs}(\text{K})_2\text{AgInCl}_6$ | $\text{Cs}(\text{Rb})_2\text{AgInCl}_6$ | $\text{Cs}_2\text{Ag}(\text{Pb})\text{In}(\text{Pb})\text{Cl}_6$ |
|------------------------------------------------------------------|------------------------------------------------------------------|----------------------------------------|-----------------------------------------|------------------------------------------------------------------|
| -3067.83703430                                                   | -3278.685788                                                     | -3167.676406                           | -3039.52761796                          | -4376.87914                                                      |
| $\text{Cs}_2\text{Ag}(\text{Sn})\text{In}(\text{Sn})\text{Cl}_6$ | -                                                                | -                                      | -                                       | -                                                                |
| -2962.20007834                                                   | -                                                                | -                                      | -                                       | -                                                                |
| Cs                                                               | Ag                                                               | In                                     | Cl                                      | K                                                                |
| -63.065709720                                                    | -287.14287239                                                    | -144.67274095                          | -34.494826600                           | -112.951240                                                      |
| Rb                                                               | Sn                                                               | Pb                                     | Cu                                      | Ga                                                               |
| -48.869451860                                                    | -163.00821624                                                    | -870.33864204                          | -364.89183305                           | -277.733337                                                      |

### Optical Properties:

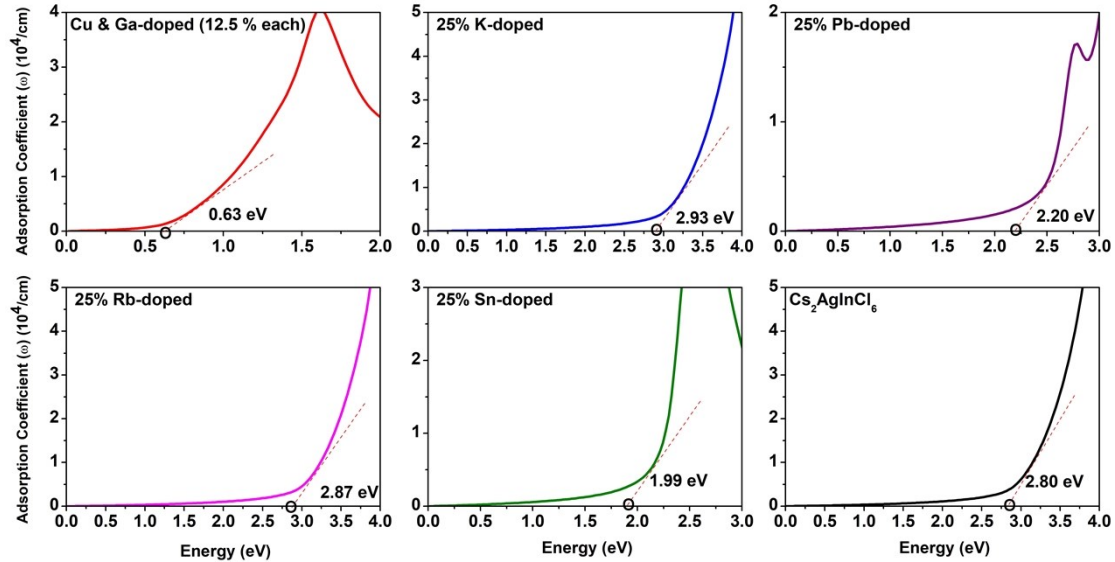

Fig. SI-6: Extrapolated band gap of pristine and its doped derivatives.

From the Table-SI2 and Fig. SI-6, we see that the optical band gap is slightly underestimated.

### Mixing Energy:

To understand the stability of the studied doped systems we have calculated the mixing energies as follows,

$$E_{\text{mixing}} = E_{\text{doped system}} + E_{\text{replaced}} - E_{\text{pristine}} - E_{\text{substituent}}$$

Where all the terms in the right side are the total energy of the respective bulk system. A positive value of  $E_{\text{mixing}}$  means the substitutional doping is endergonic in comparison to the pristine  $\text{Cs}_2\text{InAgCl}_6$  and a negative value of  $E_{\text{mixing}}$  means the substitutional doping is exergonic and more stable than pristine system. The calculated values of  $E_{\text{mixing}}$  for all the doped systems are presented in Table-SI-4.

Table-SI-4: Calculated mixing energies of the doped systems studied in this work.

| System                                                           | $E_{\text{mixing}}$ (eV) |
|------------------------------------------------------------------|--------------------------|
| $\text{Cs}(\text{K})_2\text{AgInCl}_6$                           | 0.70                     |
| $\text{Cs}(\text{Rb})_2\text{AgInCl}_6$                          | 0.38                     |
| $\text{Cs}_2\text{Ag}(\text{Pb})\text{In}(\text{Pb})\text{Cl}_6$ | -1.40                    |
| $\text{Cs}_2\text{Ag}(\text{Sn})\text{In}(\text{Sn})\text{Cl}_6$ | -0.79                    |
| $\text{Cs}_2\text{Ag}(\text{Cu})\text{In}(\text{Au})\text{Cl}_6$ | 0.88                     |

#### References:

1. P. Giannozzi, S. Baroni, N. Bonini, M. Calandra, R. Car, C. Cavazzoni, D. Ceresoli, G. L. Chiarotti, M. Cococcioni, I. Dabo and others, *J. Phys. Condens. Matter*, 2009, **21**, 395502.
2. A. Kokalj, *J. Mol. Graph. Model.*, 1999, **17**, 176–179.
